# Supplementary material for: Hole injection dynamics from two structurally related Ru–bipyridine complexes into NiOx is determined by the substitution pattern of the ligands
Source: Royal Society of Chemistry journal article supplement (doi:10.1039/c4cp05663a), 2015-01-01
Supplement: c4cp05663a1.pdf [file c4cp05663a1.pdf]

# Hole injection dynamics from two structurally related Ru-bipyridine complexes into NiO<sub>x</sub> is determined by the substitution pattern of the ligands

---

Maximilian Bräutigam<sup>1,2</sup>, Joachim Kübel<sup>1,2</sup>, Martin Schulz<sup>1,2</sup>, Johannes G. Vos<sup>5</sup>, Benjamin Dietzek<sup>1-4</sup>

<sup>1</sup> Leibniz Institute of Photonic Technology (IPHT) Jena e. V., Albert-Einstein-Str. 9, 07745 Jena, Germany

<sup>2</sup> Institute for Physical Chemistry and Abbe Center of Photonics, Friedrich-Schiller University Jena, Helmholtzweg 4, 07743 Jena, Germany, [benjamin.dietzek@ipht-jena.de](mailto:benjamin.dietzek@ipht-jena.de)

<sup>3</sup> Jena Center for Soft Matter, Friedrich-Schiller University Jena, Lessingstraße 8, 07743 Jena, Germany

<sup>4</sup> Center for Energy and Environmental Chemistry Jena (CEEC), Philosophenweg 7a, 07743 Jena, Germany

<sup>5</sup> SRC for Solar Energy Conversion, School of Chemical Sciences, Dublin City University, Dublin 9, Ireland

## Ru1 in ACN

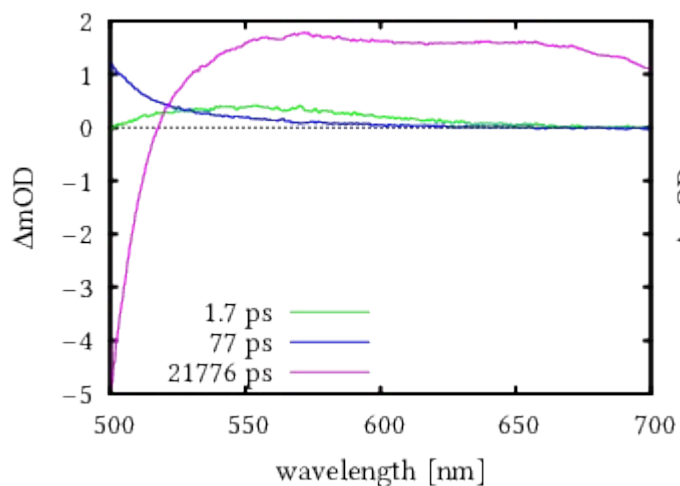

Figure: DAS of **Ru1** in ACN

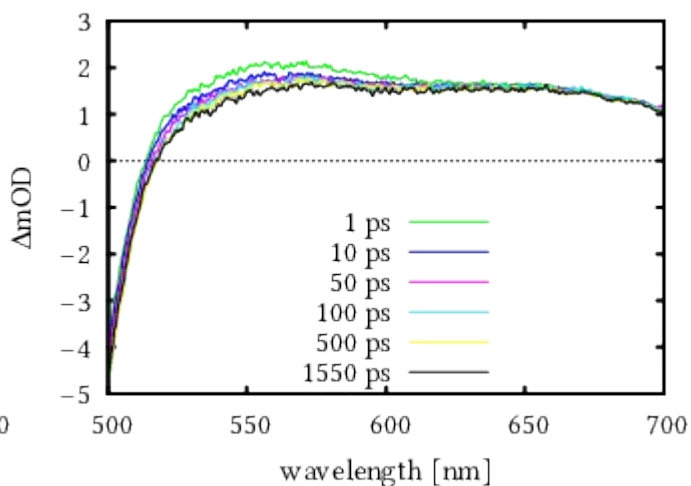

Figure: transient absorption spectra of **Ru1** in ACN

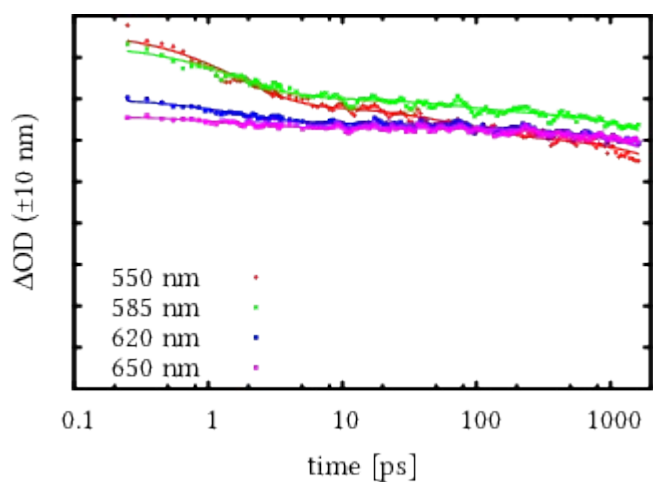

Figure: Kinetic traces at selected wavelengths of **Ru1** in ACN

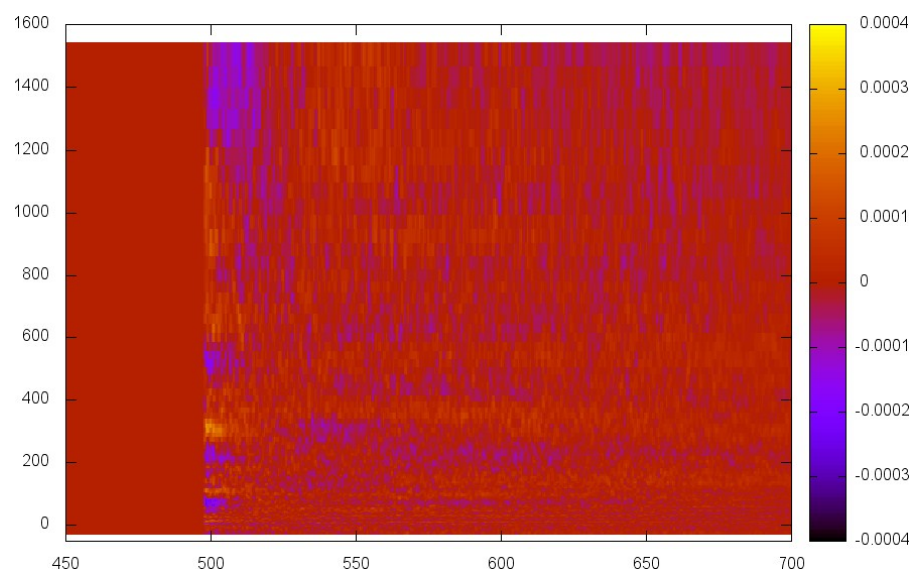

Figure: Residuals after fitting the transient absorption data of **Ru1** in ACN with a multi-exponential function

## Ru1 on NiO

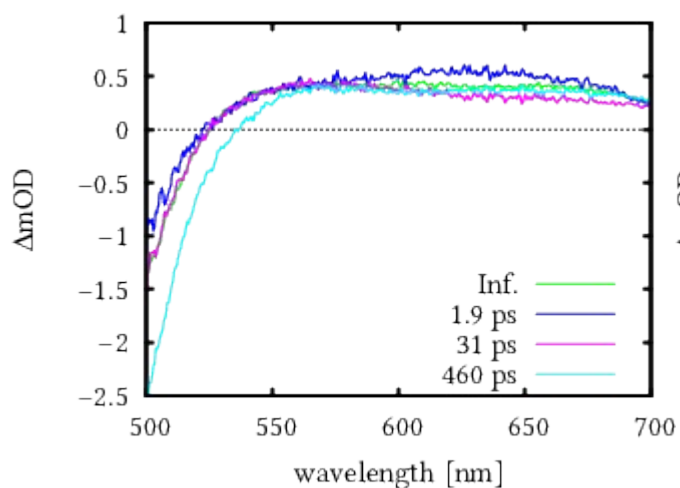

Figure: DAS of **Ru1** on NiO

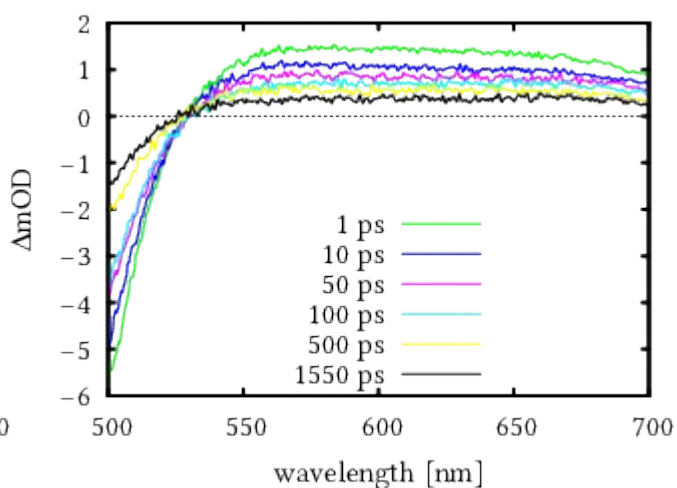

Figure: transient absorption spectra of **Ru1** on NiO

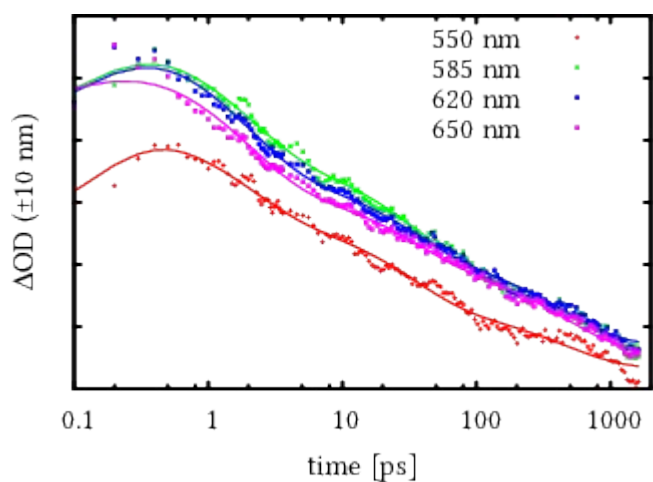

Figure: Kinetic traces at selected wavelengths of **Ru1** on NiO

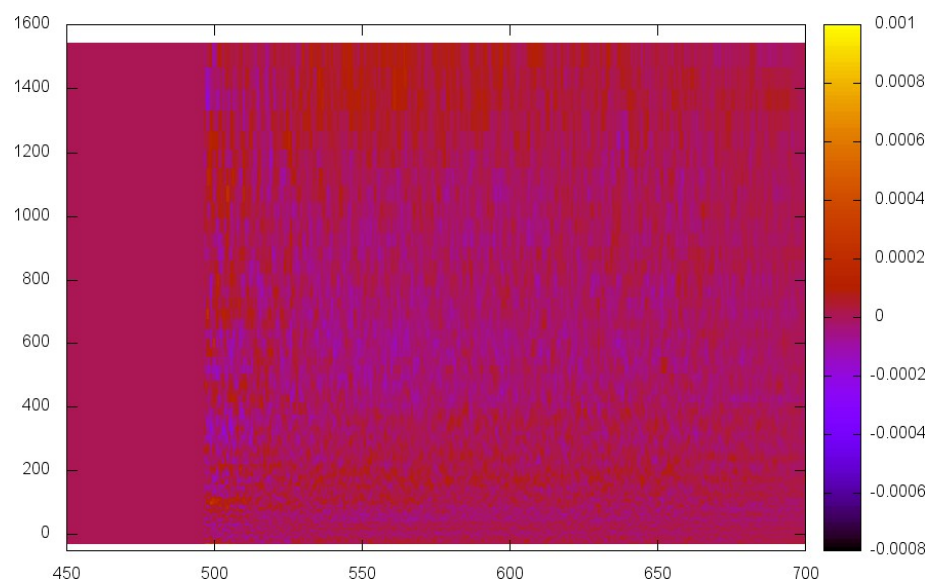

Figure: Residuals after fitting the transient absorption data of **Ru1** on NiO with a multi-exponential function

## Ru2 in ACN

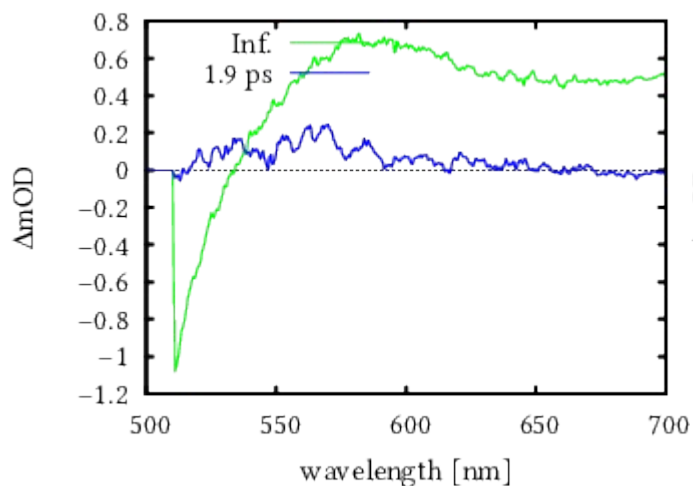

Figure: DAS of **Ru2** in ACN

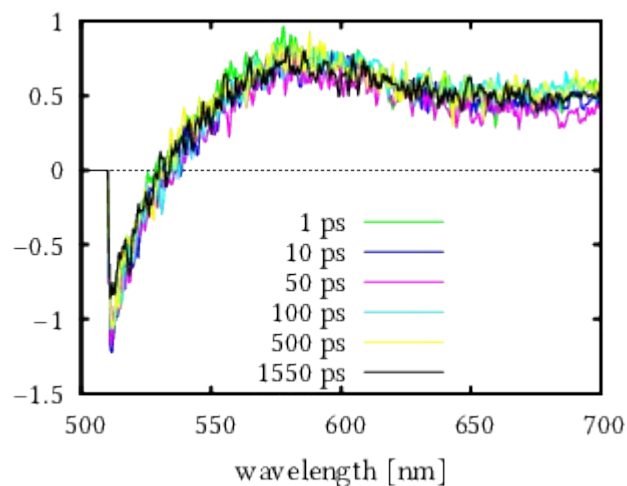

Figure: transient absorption spectra of **Ru2** in ACN

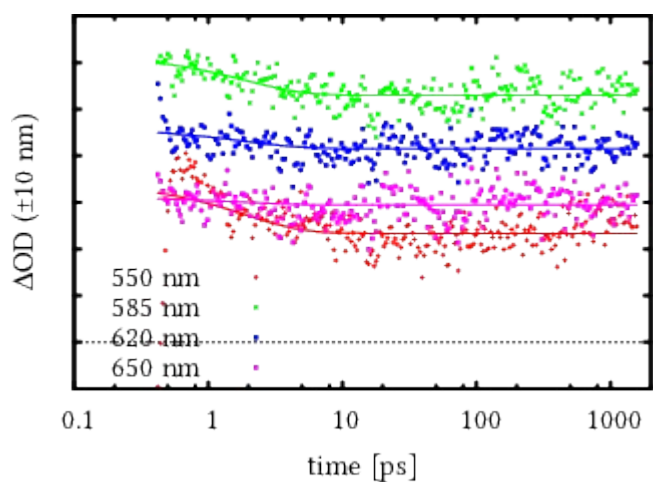

Figure: Kinetic traces at selected wavelengths of **Ru2** in ACN

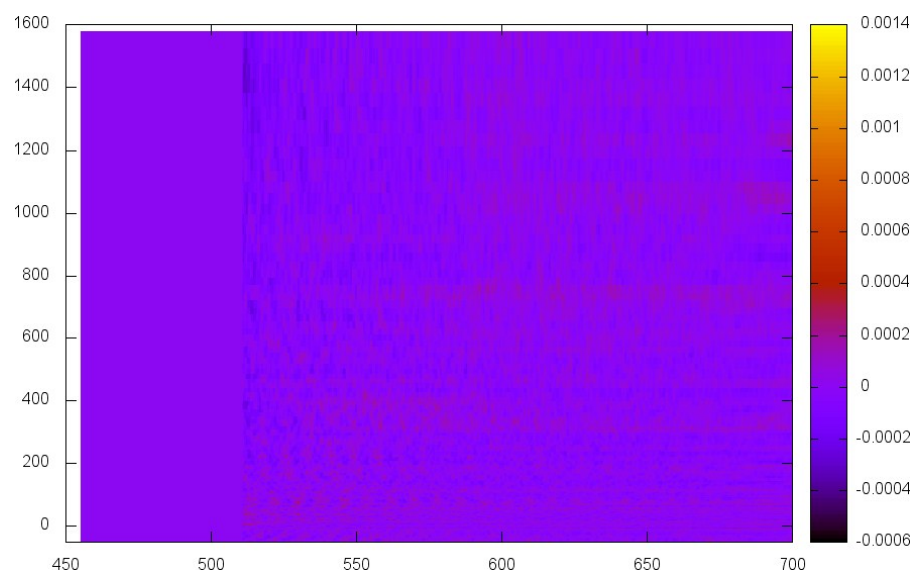

Figure: Residuals after fitting the transient absorption data of **Ru2** in ACN with a multi-exponential function

## Ru2 on NiO

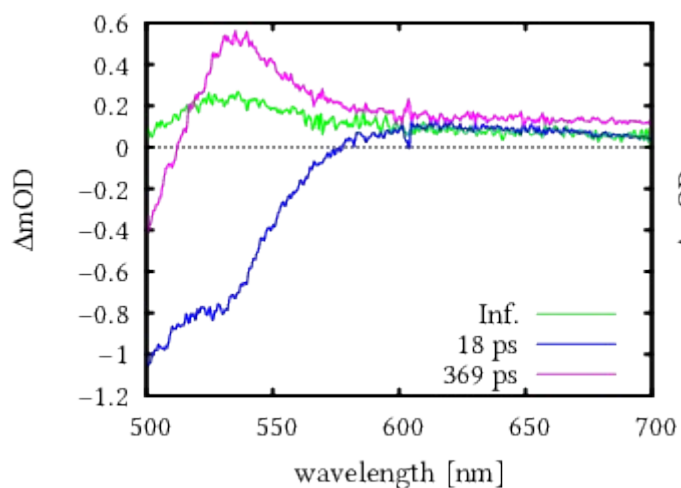

Figure: DAS of **Ru2** on NiO

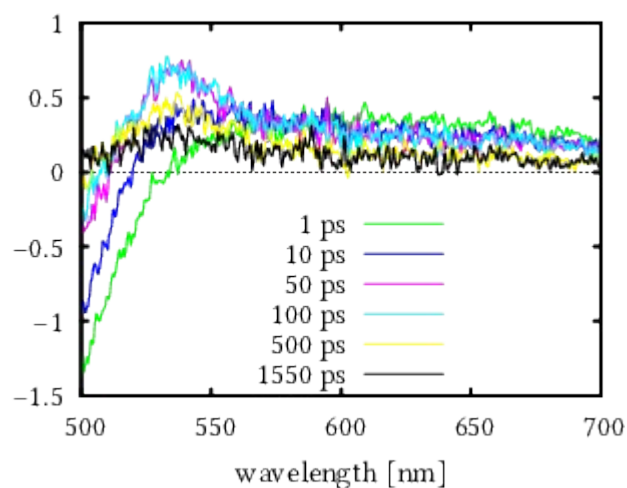

Figure: transient absorption spectra of **Ru2** on NiO

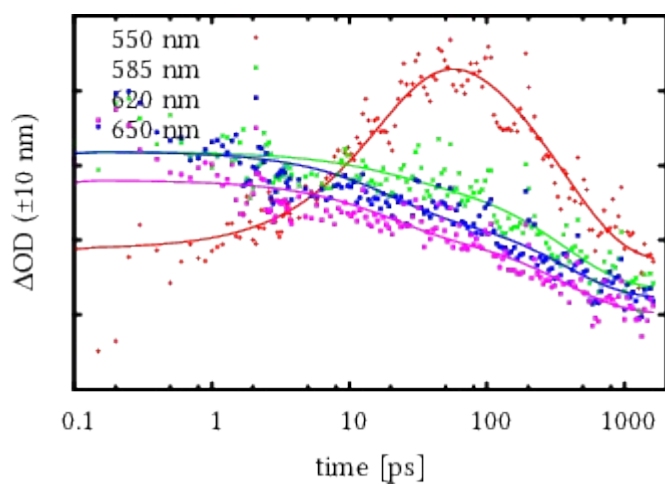

Figure: Kinetic traces at selected wavelengths of **Ru2** on NiO

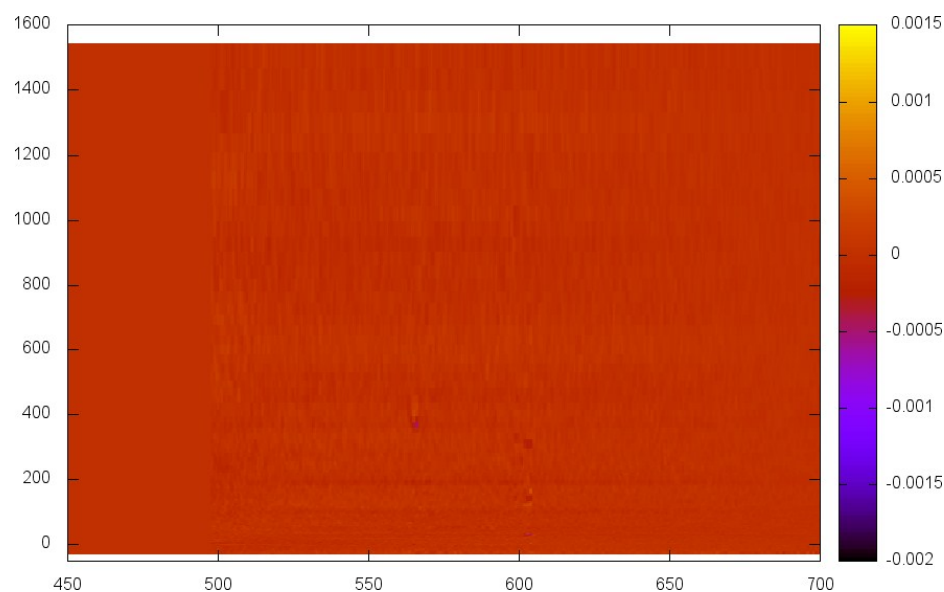

Figure: Residuals after fitting the transient absorption data of **Ru2** on NiO with a multi-exponential function
